# Supplementary material
Source: PubMed Central journal article supplement (PMC6592822)
Supplement: EMS83458-supplement-Supplementry_figures.pdf [file EMS83458-supplement-Supplementry_figures.pdf]

**Cell Stem Cell, Volume 12**

## **Supplemental Information**

### **Regulation of Glycolysis by Pdk Functions**

### **as a Metabolic Checkpoint for Cell Cycle**

### **Quiescence in Hematopoietic Stem Cells**

**Keiyo Takubo, Go Nagamatsu, Chiharu I. Kobayashi, Ayako Nakamura-Ishizu, Hiroshi Kobayashi, Eiji Ikeda, Nobuhito Goda, Yasmeen Rahimi, Randall S. Johnson, Tomoyoshi Soga, Atsushi Hirao, Makoto Suematsu, and Toshio Suda**

#### **Inventory of Supplemental Information**

Figure S1, related to Figure 1

Figure S2, related to Figure 2

Figure S3, related to Figure 3

Figure S4, related to Figure 4

Figure S5, related to Figure 5

Figure S6, related to Figure 6

Figure S7, related to Figure 7

Figure S1

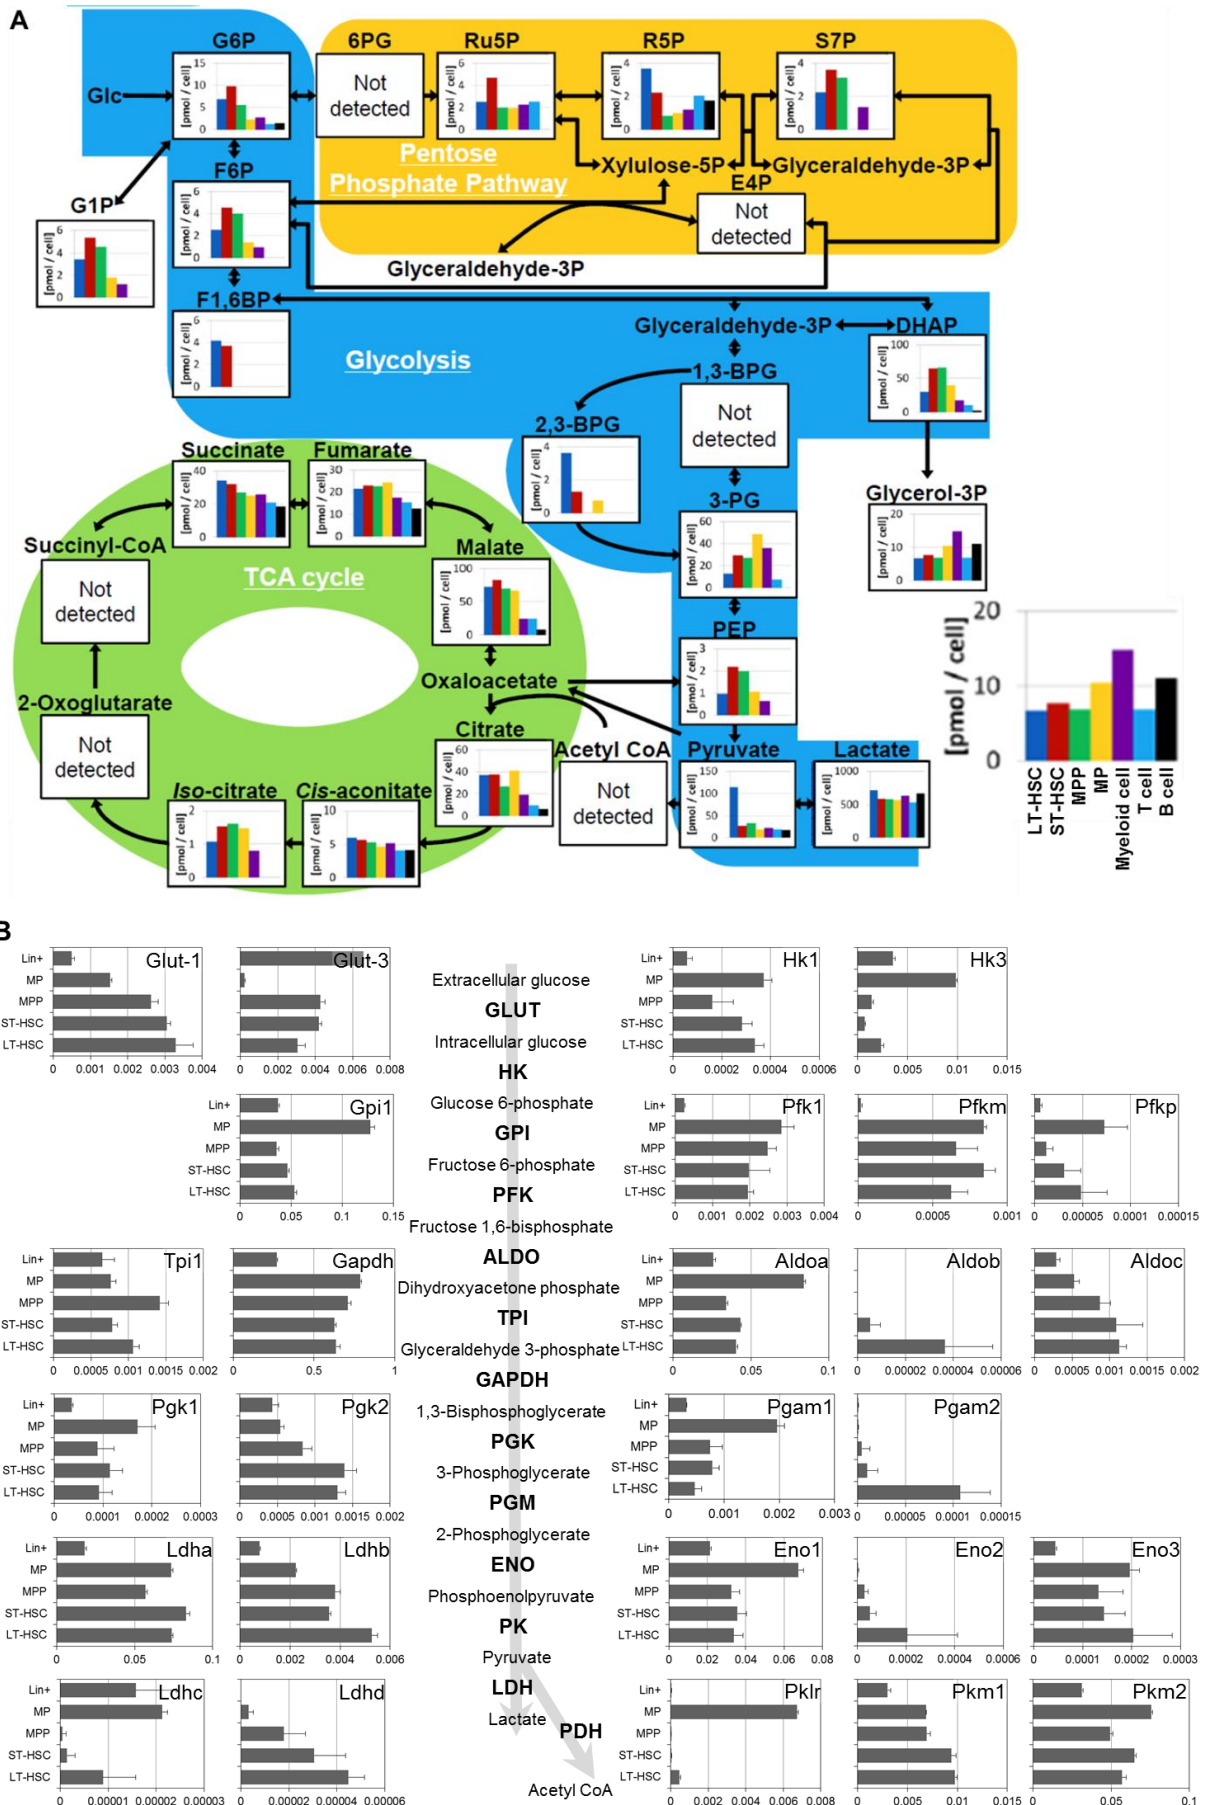

**Figure S1, related to Figure 1**

**Metabolomic profiling of central carbon metabolism in HSCs and their progeny.**

**A,** Quantification of metabolites in central carbon metabolism based on CE-TOFMS analysis. Bar graphs for independent metabolites plotted in the central carbon metabolism map are (from left to right): long-term (LT)-hematopoietic stem cells (HSCs) (CD34<sup>-</sup>Flt3<sup>-</sup> LSK cells; blue bars), short-term (ST)-HSCs (CD34<sup>+</sup>Flt3<sup>-</sup> LSK cells; red bars), multipotent progenitors (MPPs) (CD34<sup>+</sup>Flt3<sup>+</sup> LSK cells; green bars), myeloid progenitors (MPs; Lin<sup>-</sup> c-Kit<sup>+</sup> Sca-1<sup>-</sup> cells; yellow bars), Gr-1/Mac-1<sup>+</sup> myeloid cells (purple bars), CD4/CD8<sup>+</sup> T cells (sky blue bars), and B220<sup>+</sup> B lymphocytes (black bars). Metabolites not detected in any fraction are indicated as “Not detected” in the metabolic map. Data is representative of two independent experiments.

**B,** Expression levels of glycolytic enzymes in various hematopoietic compartments. Relative mRNA expression of glycolytic enzymes in wild-type BM fractions (LT-HSC, ST-HSC, MPP, MP, or Lin<sup>+</sup>). Expression levels are normalized to  $\beta$ -actin expression (mean  $\pm$  SD, n=4).

**Figure S2**

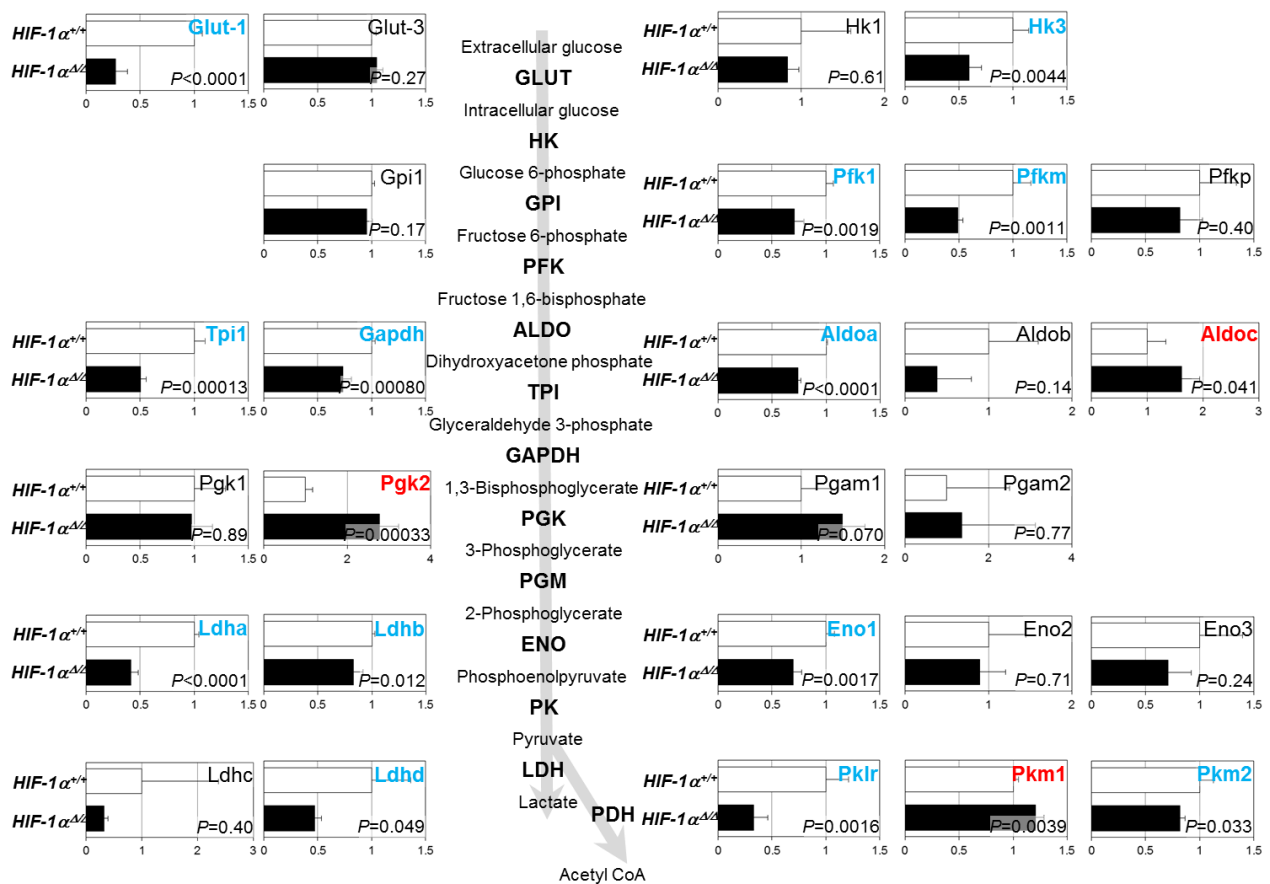

**Figure S2, related to Figure 2**

**Expression levels of glycolytic enzymes in *HIF-1α<sup>ΔΔ</sup>* LT-HSCs**

Relative mRNA expression of glycolytic enzymes in CD34<sup>-</sup> Flt-3<sup>-</sup> LSK samples from *HIF-1α<sup>+/+</sup>* (open bars) or *HIF-1α<sup>ΔΔ</sup>* (closed bars) mice. Each value is normalized to β-actin expression and expressed as fold-induction compared to levels (set to 1) detected in *HIF-1α<sup>+/+</sup>* CD34<sup>-</sup> Flt-3<sup>-</sup> LSK samples (open bars) (mean ± SD, n=4). Genes significantly downregulated or upregulated ( $P < 0.05$ ) in *HIF-1α<sup>ΔΔ</sup>* compared to *HIF-1α<sup>+/+</sup>* samples are shown in blue or red, respectively.

**Figure S3**

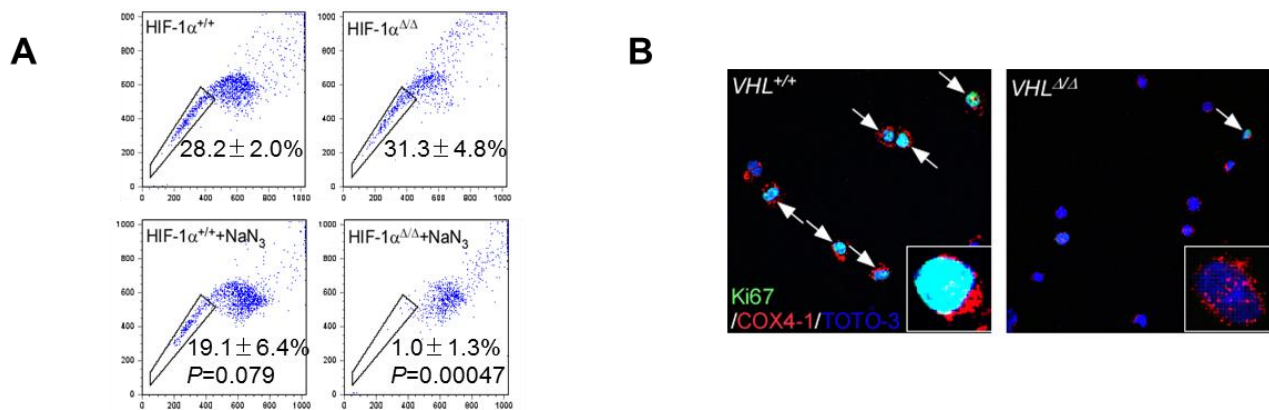

**Figure S3, related to Figure 3**

**Metabolic alterations in HIF- $\alpha$  <sup>$\Delta/\Delta$</sup>  or VHL <sup>$\Delta/\Delta$</sup>  primitive hematopoietic cells**

**A**, Flow cytometric analysis of the effects of 20mM NaN<sub>3</sub> treatment on ATP-transporter-mediated dye exclusion from HIF-1 $\alpha$ <sup>+/+</sup> or HIF-1 $\alpha$  <sup>$\Delta/\Delta$</sup>  LSK cells. The enclosed region in the FACS plots represents the mean percentage of the LSK-gated Side Population (mean  $\pm$  SD, n=3).

**B**, Immunocytochemical staining of Ki67 (green), COX4-1 (red), and TOTO-3 (blue) in VHL<sup>+/+</sup> or VHL <sup>$\Delta/\Delta$</sup>  LSK cells. Arrows indicate cells positive for both green and red signals in the nucleus. Insets show representative cells from each LSK sample.

**Figure S4**

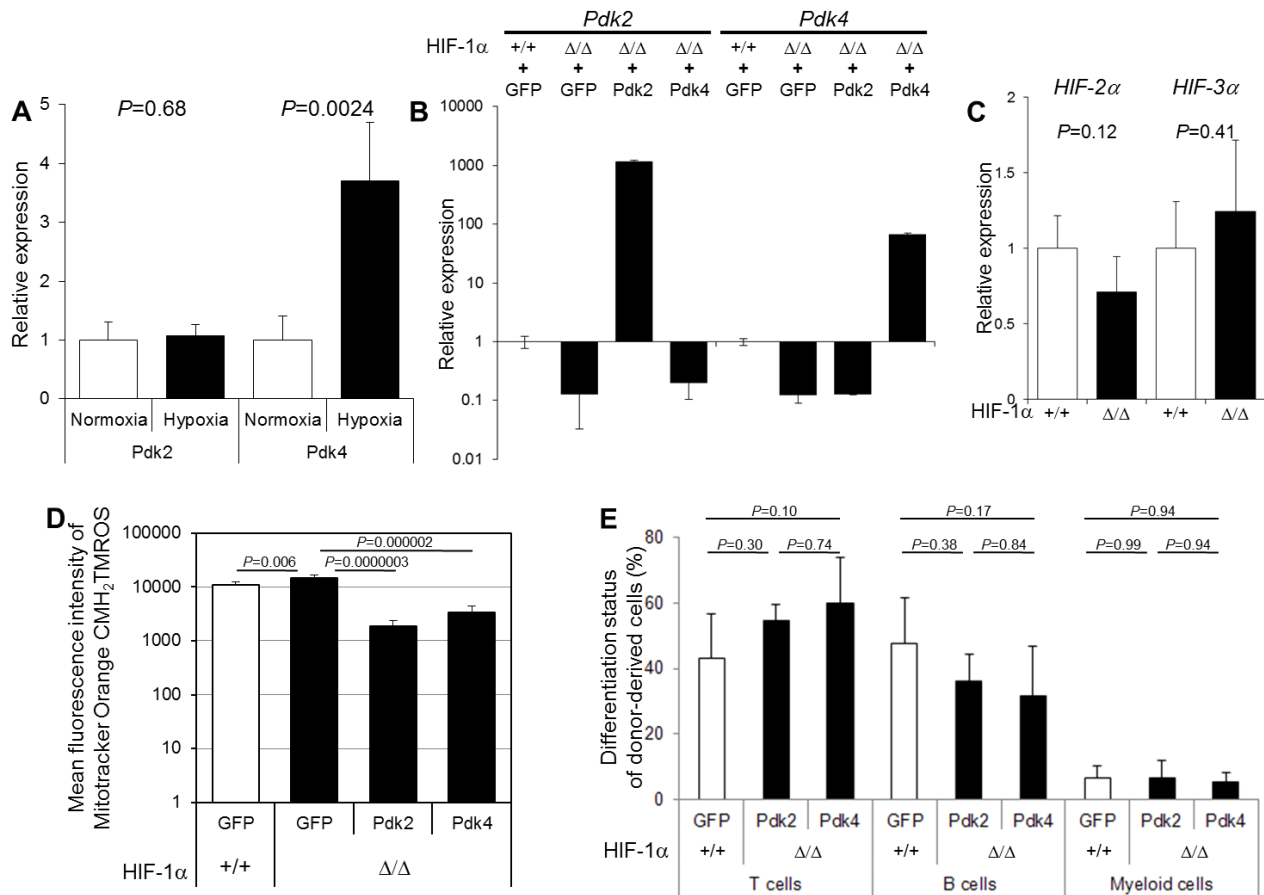

**Figure S4, related to Figure 4**

**Suppression of ROS production and efficient multilineage differentiation by Pdk2 in HIF-1α<sup>Δ/Δ</sup> HSCs**

**A**, Relative levels of Pdk2 or Pdk4 mRNAs in LT-HSCs (CD34<sup>-</sup> Flt-3<sup>-</sup> LSK cells) exposed to normoxia (20%O<sub>2</sub>) or hypoxia (1%O<sub>2</sub>) for 14 hours (n=4). Each value is normalized to β-actin expression and expressed as fold-induction compared to levels (set to 1) detected in normoxia-treated LT-HSC samples (mean ± SD, n=4).

**B**, Relative levels of Pdk2 or Pdk4 mRNAs in LT-HSCs (CD34<sup>-</sup> Flt-3<sup>-</sup> LSK cells) from HIF-1α<sup>+/+</sup> or HIF-1α<sup>Δ/Δ</sup> mice transduced with GFP, Pdk2 or Pdk4 retroviruses (n=4). Each value is normalized to β-actin expression and expressed as fold-induction compared to levels (set to 1) detected in GFP-transduced HIF-1α<sup>+/+</sup> LT-HSC samples (mean ± SD, n=4).

**C**, Relative levels of HIF-2α or HIF-3α mRNAs in LT-HSCs (CD34<sup>-</sup> Flt-3<sup>-</sup> LSK cells) from HIF-1α<sup>+/+</sup> or HIF-1α<sup>Δ/Δ</sup> mice (n=4). Each value is normalized to β-actin expression and expressed as fold-induction compared to levels (set to 1) detected in HIF-1α<sup>+/+</sup> LT-HSC samples (mean ± SD, n=4).

**D**, Mitochondrial ROS detection by Mitotracker Orange CMH<sub>2</sub>TMROS in LSK cells transduced with GFP, Pdk2 or Pdk4 retroviruses (n=5). Data are presented as the mean fluorescence intensity  $\pm$  SEM.

**E**, Differentiation status (CD4/CD8<sup>+</sup> T cells, B220<sup>+</sup> B cells, or Mac-1/Gr-1<sup>+</sup> myeloid cells) of donor-derived (Ly5.2<sup>+</sup>) PB cells in primary BMT recipients of GFP virus-transduced HIF-1 $\alpha^{+/+}$  LSK cells, GFP virus-transduced HIF-1 $\alpha^{\Delta/\Delta}$  LSK cells, Pdk2 virus-transduced HIF-1 $\alpha^{\Delta/\Delta}$  LSK cells, or Pdk4 virus-transduced HIF-1 $\alpha^{\Delta/\Delta}$  LSK cells (mean  $\pm$  SD, n=5).

**Figure S5**

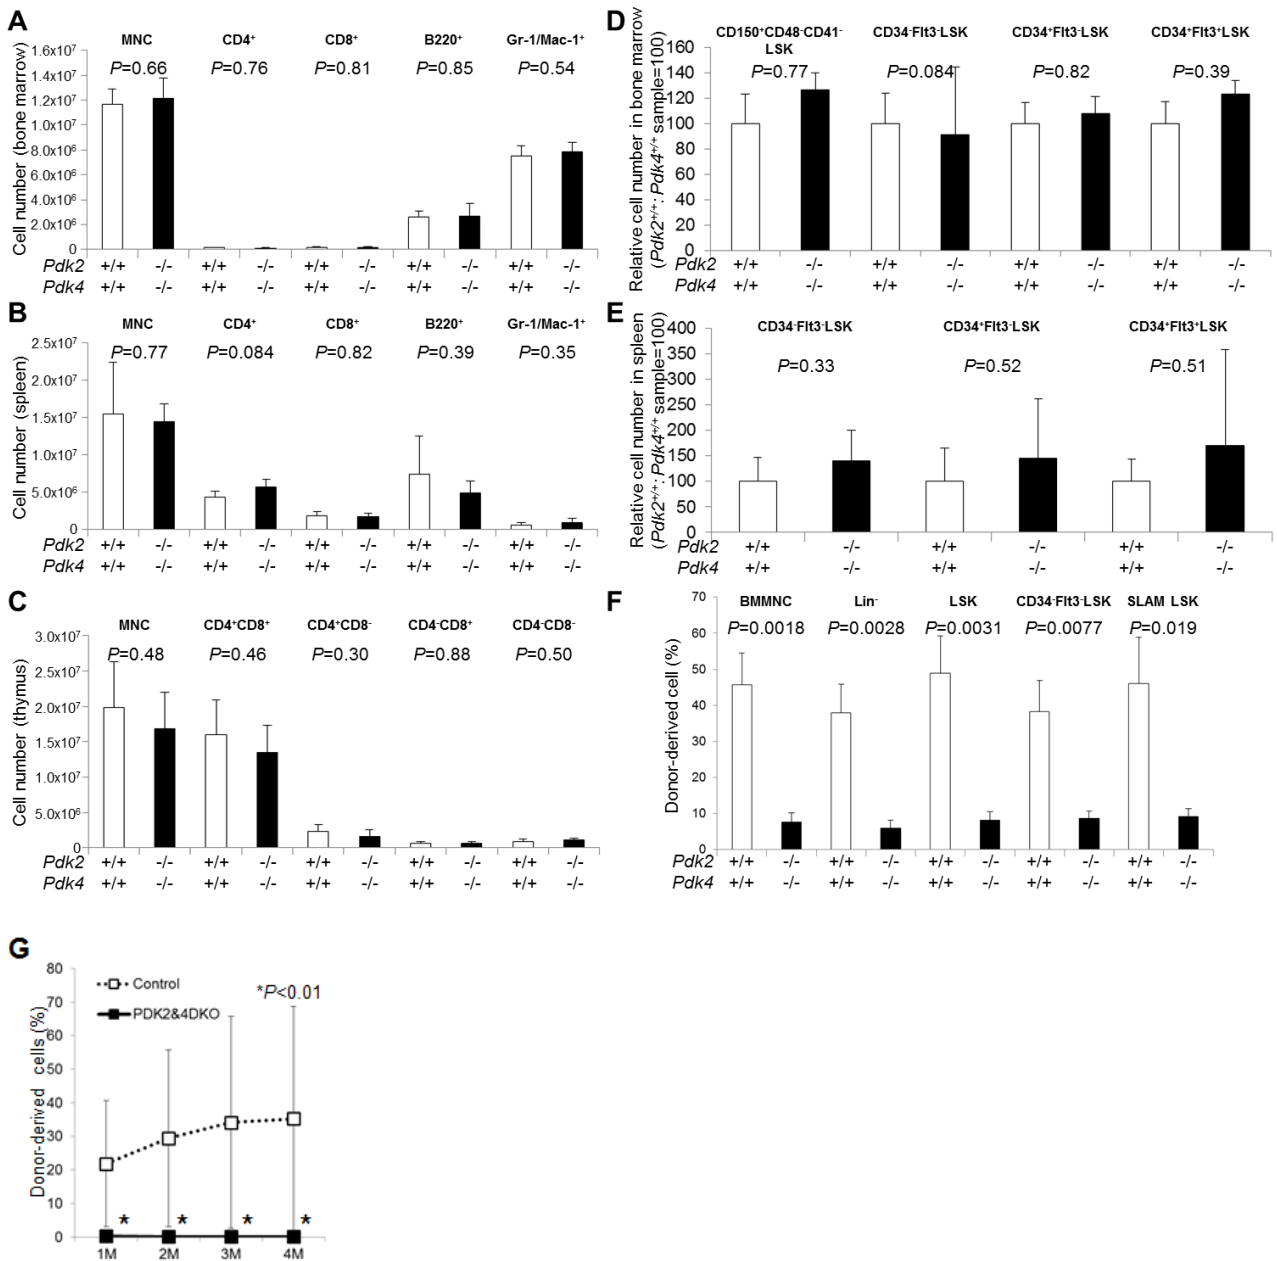

**Figure S5, related to Figure 5**

**Number of differentiated and primitive hematopoietic cells in *Pdk2*<sup>-/-</sup>; *Pdk4*<sup>-/-</sup> mice**

**A-C**, Number of MNCs or cells from various differentiated cell fractions in BM (**A**), spleen (**B**) or thymus (**C**) of *Pdk2*<sup>-/-</sup>; *Pdk4*<sup>-/-</sup> mice (mean ± SD, n=4).

**D, E**, Number of cells in primitive cell fractions including CD34<sup>+</sup>Fit3<sup>-</sup> LSK, CD34<sup>+</sup>Fit3<sup>-</sup> LSK, or CD34<sup>+</sup>Fit3<sup>+</sup> LSK in BM (**D**) or spleen (**E**) of *Pdk2*<sup>-/-</sup>; *Pdk4*<sup>-/-</sup> mice (mean ± SD, n=4).



**F**, Donor-derived (Ly5.2+) BM MNC, Lin<sup>-</sup>, LSK, CD34-Flt3<sup>-</sup> LSK or SLAM-LSK chimerism in secondary BMT recipients of control (open bars) or *Pdk2*<sup>-/-</sup>:*Pdk4*<sup>-/-</sup> (closed bars) LT-HSCs 4 months after primary BMT (mean ± SEM, n = 10).

**G**, PB chimerism in tertiary recipients of BM derived from secondary recipients of control (open boxes) or *Pdk2*<sup>-/-</sup>:*Pdk4*<sup>-/-</sup> (closed boxes) MNCs, at indicated times after BMT (mean ± SD, n = 10).

**Figure S6**

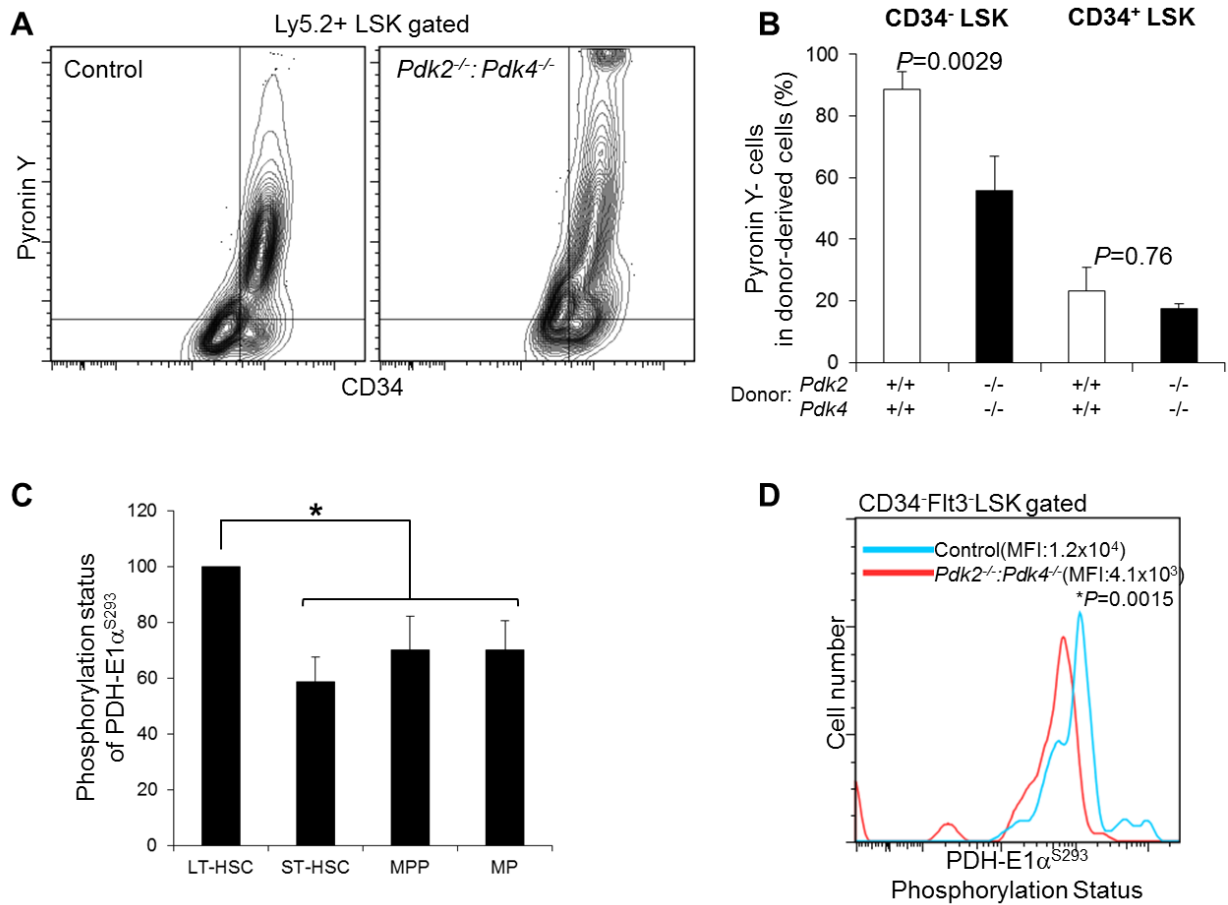

**Figure S6, related to Figure 6**

***Pdk2<sup>-/-</sup>; Pdk4<sup>-/-</sup>* LT-HSCs lose quiescence in a normal microenvironment**

**A**, Representative flow cytometric plot of Pyronin Y analysis in the LSK gated fraction of control or *Pdk2<sup>-/-</sup>; Pdk4<sup>-/-</sup>* BM mice.

**B**, Summary of flow cytometric Pyronin Y analysis of CD34<sup>-</sup> LSK or CD34<sup>+</sup> LSK fractions in control or *Pdk2<sup>-/-</sup>; Pdk4<sup>-/-</sup>* BM mice (mean  $\pm$  SD, n=3).

**C**, Detection of phosphorylated PDH-E1 $\alpha^{S293}$  by intracellular flow cytometry in LT-HSC, ST-HSC, MPP, and MP fractions. Mean fluorescence intensity (MFI) of anti-phosphorylated PDH-E1 $\alpha^{S293}$  antibody staining is normalized to MFI detected in the LT-HSC fraction (mean  $\pm$  SD, n=3, \**P*<0.001).

**D**, Representative histogram comparing phosphorylated PDH-E1 $\alpha^{S293}$  levels using intracellular flow cytometry analysis of control versus *Pdk2<sup>-/-</sup>; Pdk4<sup>-/-</sup>* LT-HSCs. Average MFIs are shown (n=3, \**P*=0.0015).

**Figure S7**

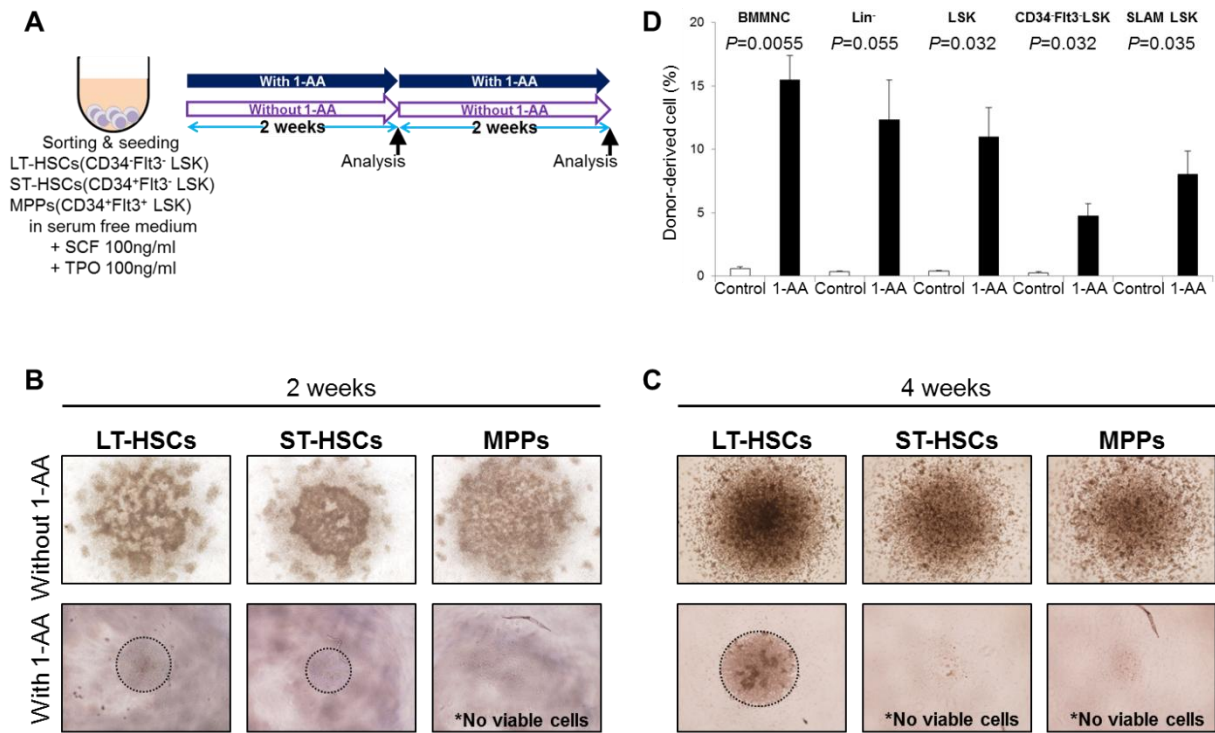

**Figure S7, related to Figure 7**

**Effect of 1-AA on colony formation of LT-HSCs, ST-HSCs or MPPs**

**A**, Design of LT-HSC, ST-HSC, or MPP cultures treated without or with 1-AA for 2 or 4 weeks.

**B**, Light microscopic analysis of colonies cultured 2 weeks from LT-HSC, ST-HSC, or MPP cultures treated with or without 1-AA.

**C**, Light microscopic analysis of colonies cultured 4 weeks from LT-HSC, ST-HSC, or MPP cultures treated with or without 1-AA.

**D**, Donor-derived (Ly5.1+) BM MNC, Lin-, LSK, CD34-Fit3- LSK or SLAM-LSK chimerism in primary BMT recipients of control LT-HSCs (open bars) or LT-HSCs treated with 1-AA for 4 weeks (closed bars) 4 months after BMT (mean  $\pm$  SEM, n = 4-5).
